# Supplementary material
Source: PubMed Central journal article supplement (PMC1905893)

## Supplementary Figure S1.

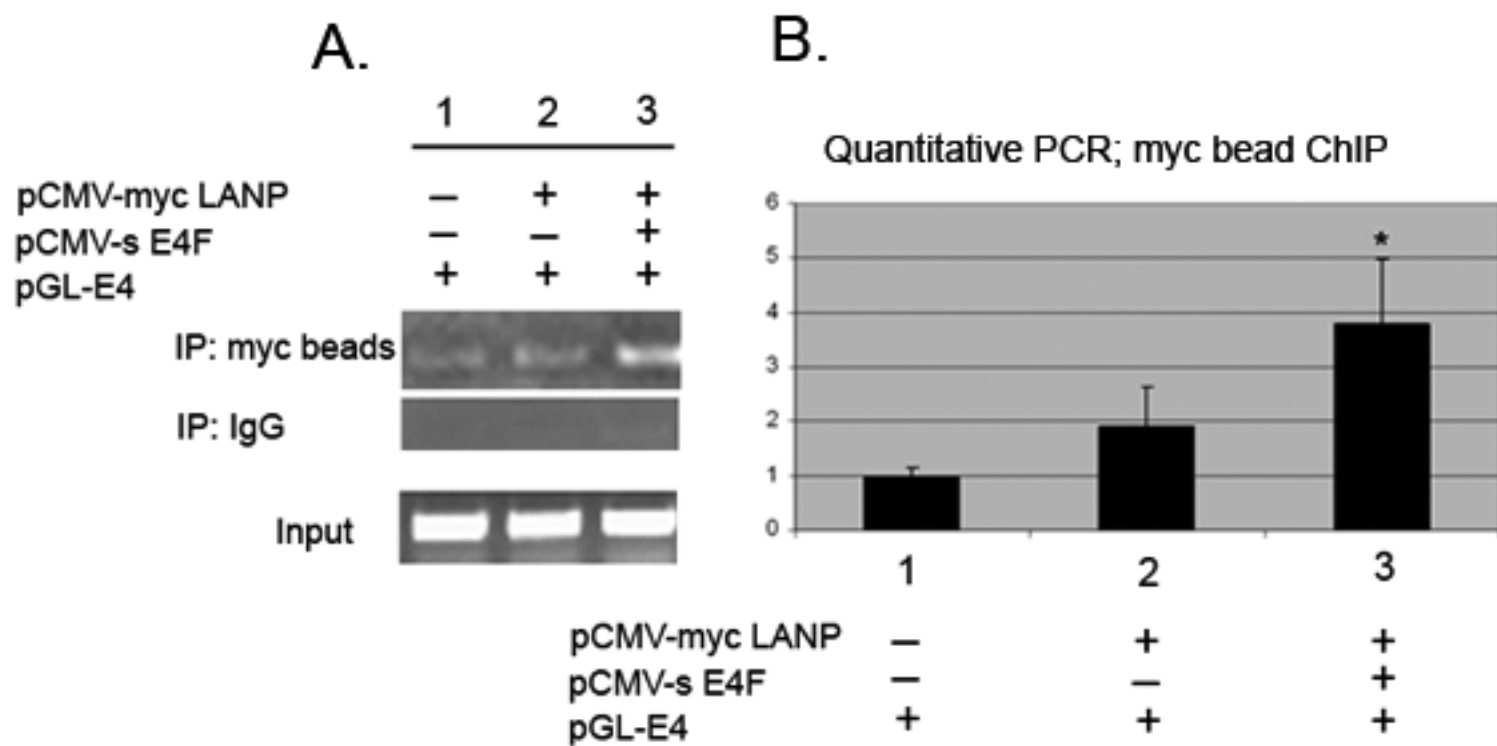

Supplement: 7400983-s2.pdf [file 7400983-s2.pdf]

# Supplementary Figure S2.

A.

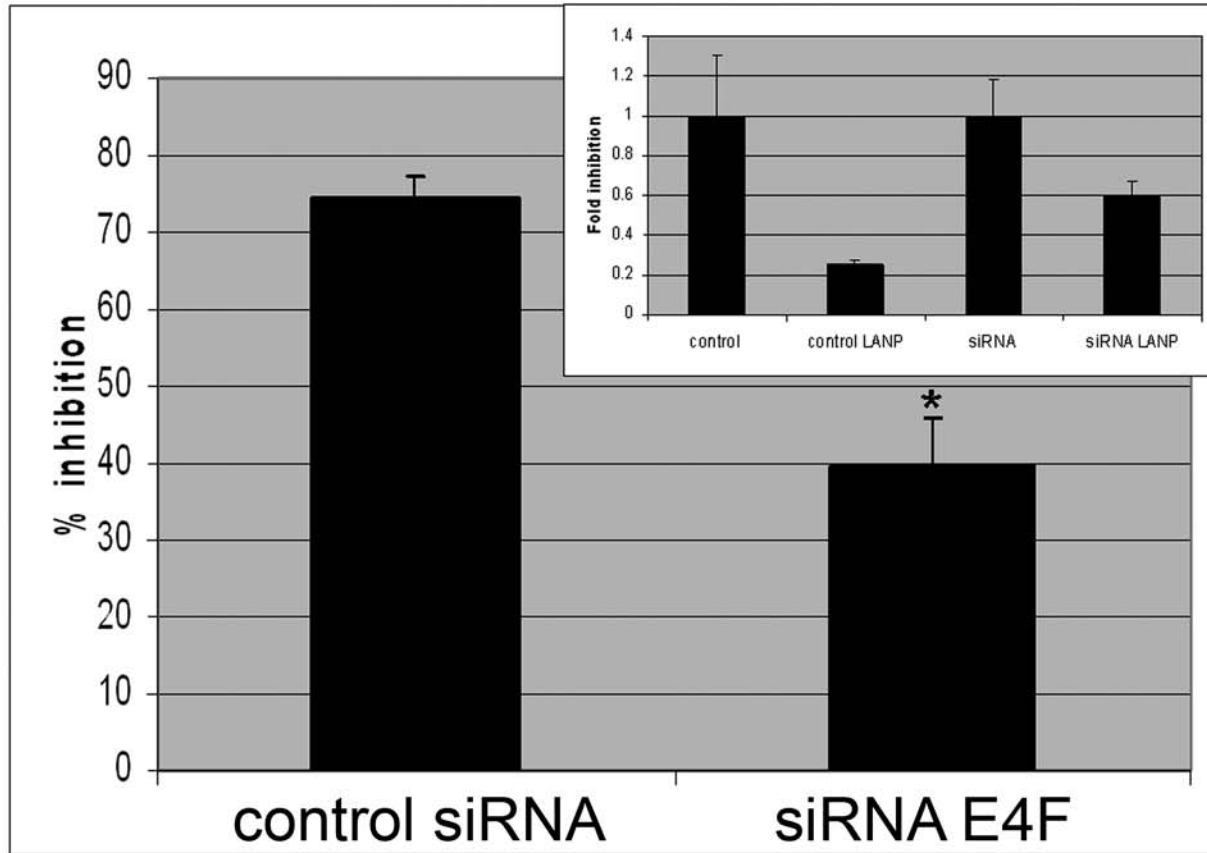

B.

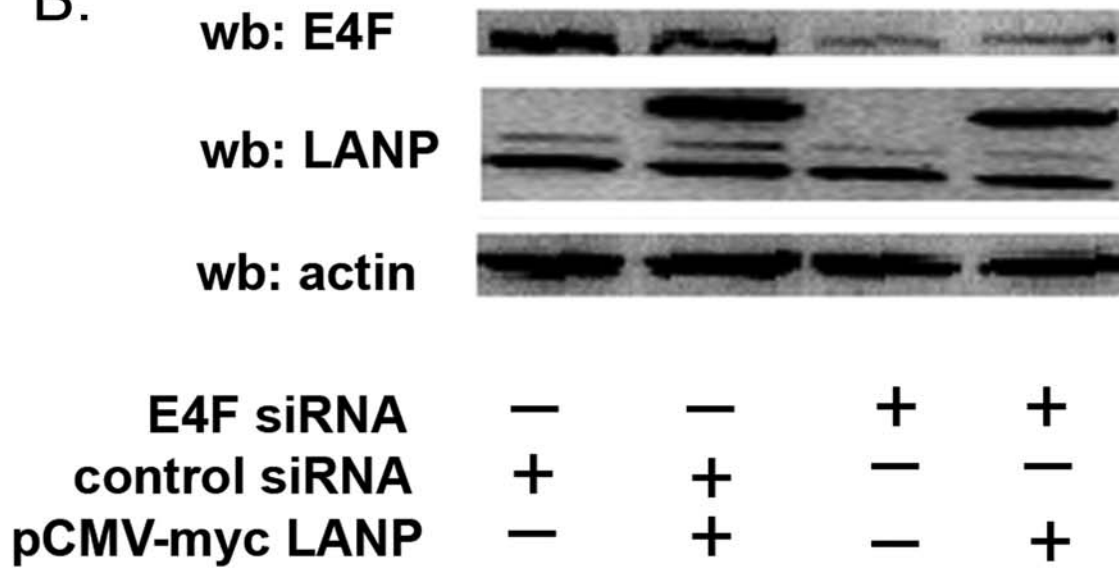

Supplement: 7400983-s3.pdf [file 7400983-s3.pdf]
